# Supplementary material for: Impact of Routine Management Procedures on the Welfare of Suckling Piglets
Source: MDPI journal article supplement (doi:10.3390/vetsci9010032), 2022-01-17
Supplement: s1 [file s1]

Review

# Impact of Routine Management Procedures on the Welfare of Suckling Piglets

Simone M. Schmid and Julia Steinhoff-Wagner

## Supplementary Materials:

**Table S1.** Overview of peer-reviewed studies investigating the effect of marking for identification in suckling piglets.

| Author (year)                  | Setting/<br>Groups (n)              | Piglet age                                 | Technique(s)<br>(n)               | Other<br>procedures<br>performed<br>(n) | Investigated<br>parameters |    |    |     | Main findings                                                                                                                                                                                                                                                                 |
|--------------------------------|-------------------------------------|--------------------------------------------|-----------------------------------|-----------------------------------------|----------------------------|----|----|-----|-------------------------------------------------------------------------------------------------------------------------------------------------------------------------------------------------------------------------------------------------------------------------------|
|                                |                                     |                                            |                                   |                                         | B&V                        | PP | WH | G&V |                                                                                                                                                                                                                                                                               |
| Babot <i>et al.</i> (2006)     | ID (1822)                           | 1–3 w                                      | ET (1533); EET (1446); TIP (1455) | ID with 2 or 3 devices                  |                            |    | X  | X   | <b>Short- and long-term</b><br>-No negative effects on animal welfare and performance<br>-No relevant infections or inflammatory reactions after ET                                                                                                                           |
| Barbieri <i>et al.</i> (2012)  | ID (96)                             | 10 d                                       | EET, TAB, TIP, T                  | -                                       | X                          |    | X  |     | <b>Acute</b><br>-Time required for application differed ( $p < 0.001$ )<br><b>Short- and long-term</b><br>-No healing problems or breakages of the electronic devices<br>-Most frequent behaviors: head shaking and ear scratching; more in piglets after EET ( $p < 0.001$ ) |
| Bergqvist <i>et al.</i> (2015) | ID (80)                             | 4 d (EET);<br>1–2 w and<br>9–10 w<br>(TAB) | EET, TAB<br>(different sizes)     | -                                       |                            |    | X  | X   | <b>Short- and long-term</b><br>-TAB better at 9–10 weeks old (retention rate; $p = 0.058$ )<br>-ET more tissue damage than TAB ( $p = 0.001$ ); lesions at slaughter                                                                                                          |
| Bovey <i>et al.</i> (2014)     | ID < 1 kg (40),<br>ID ≥ 1.2 kg (80) | 1 d (60), 3<br>d (60)                      | EN                                | TD (COLD),<br>BS                        | X                          | X  |    | X   | <b>Acute</b><br>-Light piglets fewer calls ( $p < 0.05$ ), heavier piglets processed on d 3 higher frequency ( $p = 0.05$ )<br><b>Short- and long-term</b><br>-More dog-sitting, less lying, more isolation, less sucking (males) in light group ( $p < 0.01$ )               |



| Author<br>(year)              | Setting/<br>Groups (n) | Piglet age     | Technique(s)<br>(n)                                                     | Other<br>procedures<br>performed<br>(n) | Investigated<br>parameters |    |    |     | Main findings                                                                                                                                                                                                                                                                    |
|-------------------------------|------------------------|----------------|-------------------------------------------------------------------------|-----------------------------------------|----------------------------|----|----|-----|----------------------------------------------------------------------------------------------------------------------------------------------------------------------------------------------------------------------------------------------------------------------------------|
|                               |                        |                |                                                                         |                                         | B&V                        | PP | WH | G&V |                                                                                                                                                                                                                                                                                  |
|                               |                        |                |                                                                         |                                         |                            |    |    |     | -Immunoglobulins lower in light group regardless of age at processing ( $p \leq 0.06$ )<br>-Higher mortality in light piglets ( $p < 0.01$ )                                                                                                                                     |
| Caja <i>et al.</i><br>(2005)  | ID (557)               | 0 d            | ET (348), EET (209), TIP (309), TAB (248) (different sizes and devices) | -                                       |                            |    | X  |     | <b>Acute</b><br>-Time required for TIP and TAB differed ( $p < 0.001$ )<br><b>Short- and long-term</b><br>-No apparent animal health alterations observed<br>-After TIP, no inflammatory reactions or abscesses<br>-No reactions after ET and EET<br>-No effect of TIP on growth |
| Cordeiro <i>et al.</i> (2018) | ID (20)                | 7 d            | EN                                                                      | TD (HOT), CAS (PULL)                    | X                          |    |    |     | <b>Acute</b><br>-Lower signal intensity during handling than during EN, TD, CAS<br>-Signal duration increased from with handling, EN, TD, CAS                                                                                                                                    |
| Gosálvez <i>et al.</i> (2007) | ID (351)               | 35 d, 124 d    | ET & T (left ear), EET (right ear)                                      | -                                       |                            |    | X  | X   | <b>Short- and long-term</b><br>-No infections, inflammatory reactions, or alterations in ear or injection area<br>-No negative effects on pig growth                                                                                                                             |
| Gruys <i>et al.</i> (1993)    | ID (55)                | 3 w            | TAB (glass-encapsulated)                                                | -                                       |                            |    | X  |     | <b>Short- and long-term</b><br>-No abscesses found, no foreign body reaction<br>-Signs of inflammation after 3 d                                                                                                                                                                 |
| Lambooij <i>et al.</i> (1992) | ID (56)                | 4–5 w          | TAB (PET-covered), injection with different needles                     | -                                       |                            |    | X  |     | <b>Short- and long-term</b><br>-From d 2 inflammatory signs in injection areas, decrease after d 3<br>-2 <sup>nd</sup> inflammation series from day 7, continuous swelling                                                                                                       |
| Lambooij <i>et al.</i> (1995) | ID (5947)              | 4–5 w          | TAB (different devices)                                                 | -                                       |                            |    | X  |     | <b>Short- and long-term</b><br>-3 weeks after injection: inflammation in 0.6% piglets                                                                                                                                                                                            |
| Lammers <i>et al.</i> (1995)  | ID (204)               | 10 d, 4 w, 6 m | TAB                                                                     | -                                       |                            |    | X  |     | <b>Acute</b><br>-Difficult injection in 10 d pigs, easier at 4 w<br>-Exudate around transponder only in 1 gilt                                                                                                                                                                   |



| Author<br>(year)                           | Setting/<br>Groups (n)                      | Piglet age | Technique(s)<br>(n)    | Other<br>procedures<br>performed<br>(n)                                    | Investigated<br>parameters |    |    |     | Main findings                                                                                                                                                                                                                                                                                                                                                                                                                                                          |
|--------------------------------------------|---------------------------------------------|------------|------------------------|----------------------------------------------------------------------------|----------------------------|----|----|-----|------------------------------------------------------------------------------------------------------------------------------------------------------------------------------------------------------------------------------------------------------------------------------------------------------------------------------------------------------------------------------------------------------------------------------------------------------------------------|
|                                            |                                             |            |                        |                                                                            | B&V                        | PP | WH | G&V |                                                                                                                                                                                                                                                                                                                                                                                                                                                                        |
| Leslie <i>et al.</i><br>(2010)             | ID,<br>SHAMear,<br>SHAMTIP<br>(total: 120)  | 4–12 d     | ET, EN, TIP<br>(glass) | SS, BS                                                                     | X                          | X  |    | X   | <b>Acute</b><br>-Highest sound pressure among EN ( $p = 0.059$ )<br>-Lactate levels increased ( $p < 0.05$ ) in ear notched animals<br>-Cortisol increased ( $p < 0.05$ ); no differences between groups<br><b>Short-term</b><br>-Increase in awake inactive behaviors relative to controls<br>-Longer periods of isolation in ET and TIP injected piglets ( $p < 0.05$ )<br>-Isolation among ET not different from EN; higher ( $p < 0.05$ ) than SHAMear and SHAMTIP |
| Llamas<br>Moya <i>et al.</i><br>(2007)     | ID, CON<br>(total: 96<br>piglets)           | 0 d        | EN                     | TR, TD, BS                                                                 |                            | X  |    |     | <b>Short-term</b><br>-TR: tended to have higher levels of plasma Haptoglobin than CON, no other differences<br>-age effects were not affected by processing; no systemic inflammation in early life due to processing                                                                                                                                                                                                                                                  |
| Lomax <i>et al.</i><br>(2018)              | ID (10),<br>SHAM (10)                       | 3–5 d      | EN                     | -                                                                          | X                          |    |    |     | <b>Acute</b><br>-Probability to respond to EN: 98.7% for EN piglets, 0.9% for SHAM                                                                                                                                                                                                                                                                                                                                                                                     |
| Marchant-<br>Forde <i>et al.</i><br>(2009) | ID (32), SHAM<br>+ blood (16),<br>SHAM (16) | 2–3 d      | EN (16), ET (16)       | BS                                                                         | X                          | X  | X  | X   | <b>Acute</b><br>-EN longer duration than ET<br>-EN: calls with higher peak frequencies than SHAM groups<br><b>Short- and long-term</b><br>-EN: worse wound scores than ET ( $p < 0.05$ )<br>-Cortisol at 4 h greater in EN ( $p < 0.10$ )                                                                                                                                                                                                                              |
| Marchant-<br>Forde <i>et al.</i><br>(2014) | ID (40), SHAM<br>+ blood (20),<br>SHAM (20) | 2–3 d      | ET (20), EN (20)       | TR (CLIP or<br>GRIND), IA<br>(INJ or<br>ORAL), CAS<br>(CUT or<br>PULL), TD | X                          | X  | X  | X   | <b>Acute</b><br>-EN longer duration<br>-EN and ET more vocalization, escape attempts than SHAM ( $p < 0.05$ )<br><b>Short- and long-term</b><br>-Cortisol higher after 45 minutes in ET and EN ( $p < 0.05$ )                                                                                                                                                                                                                                                          |



| Author<br>(year)               | Setting/<br>Groups (n)          | Piglet age | Technique(s)<br>(n)                        | Other<br>procedures<br>performed<br>(n) | Investigated<br>parameters |    |    |     | Main findings                                                                                                                                                                                                                                                                                                                                                     |
|--------------------------------|---------------------------------|------------|--------------------------------------------|-----------------------------------------|----------------------------|----|----|-----|-------------------------------------------------------------------------------------------------------------------------------------------------------------------------------------------------------------------------------------------------------------------------------------------------------------------------------------------------------------------|
|                                |                                 |            |                                            |                                         | B&V                        | PP | WH | G&V |                                                                                                                                                                                                                                                                                                                                                                   |
|                                |                                 |            |                                            | (HOT or<br>COLD), BS                    |                            |    |    |     | -1 w after EN higher $\beta$ -endorphin, more ear wounds ( $p < 0.05$ )                                                                                                                                                                                                                                                                                           |
| Noonan <i>et al.</i> (1994)    | ID (111),<br>SHAM (56)          | 1–3 d      | EN                                         | TD (56),<br>TR (55)                     | X                          |    |    |     | <b>Short-term</b><br>-Processed piglets: different behavior ( $p < 0.05$ ); head shaking after EN<br>-Restraint also stressful<br>-No age effect                                                                                                                                                                                                                  |
| Numberger <i>et al.</i> (2016) | ID (30), SHAM<br>(30), a. o.    | 3–4 d      | ET                                         | BS                                      |                            | X  |    |     | <b>Short-term</b><br>-At 7 h cortisol returned to base values in all groups<br>-ET: greater cortisol response than SHAM at 30 and 60 min ( $p \leq 0.001$ )                                                                                                                                                                                                       |
| Prola <i>et al.</i> (2010)     | ID (60)                         | 6–10 d     | ET (15), TIP (15),<br>TAB (15),<br>TP (15) | -                                       |                            |    | X  |     | <b>Acute</b><br>-No apparent disturbances at application<br><b>Short- and long-term</b><br>-After TIP and ET, no inflammatory reactions or abscesses<br>-No health problems observed                                                                                                                                                                              |
| Stärk <i>et al.</i> (1998)     | ID (180)                        | 3–4 w      | ET, EET, TAB<br>(2 devices)                | -                                       |                            |    | X  |     | <b>Acute</b><br>-Use of single shot needles more time consuming<br><b>Short- and long-term</b><br>-Signs of infection at implantation site in 3.3% of pigs (only type A)<br>-Faster healing, less swelling, fewer infections with product B                                                                                                                       |
| Torrey <i>et al.</i> (2009)    | ID (40), SHAM<br>(40), CON (40) | 1 d, 3 d   | EN                                         | TD, BS                                  | X                          | X  |    | X   | <b>Acute</b><br>-EN, regardless of age, greater frequency ( $p < 0.001$ ) and more high frequency calls ( $p = 0.016$ ) than SHAM<br>-D 1: more high frequency calls than on d 3 ( $p = 0.047$ )<br><b>Short-term</b><br>-SHAM and EN: less time lying and more time standing than CON ( $p < 0.001$ )<br>-EN: more tail jamming than SHAM or CON ( $p < 0.001$ ) |



---

| Author<br>(year) | Setting/<br>Groups (n) | Piglet age | Technique(s)<br>(n) | Other<br>procedures<br>performed<br>(n) | Investigated<br>parameters |    |    |     | Main findings                                                                                                                    |
|------------------|------------------------|------------|---------------------|-----------------------------------------|----------------------------|----|----|-----|----------------------------------------------------------------------------------------------------------------------------------|
|                  |                        |            |                     |                                         | B&V                        | PP | WH | G&V |                                                                                                                                  |
|                  |                        |            |                     |                                         |                            |    |    |     | -Lying, standing and tail posture not influenced by age<br>-More trembling in d 1 piglets than in piglets on d 3 ( $p < 0.001$ ) |

---

a. o. = and others; BS = blood sampling; B&V = Behavior & vocalization; CAS = castration; CON = control piglets (not handled); d = days; EET = electronic ear tag; EN = ear notching; ET = ear tagging; G&V = growth & vitality; IA = iron application; ID = marking for identification; INJ = injection; m = months; PP = physiological parameters; SHAM = sham-handled piglets; SS = saliva sampling; T = tattoo; TAB = transponder at auricle base; TD = tail docking; TIP = intraperitoneal injected transponder; TP = transponder at perineum; TR = teeth resection; w = weeks; WH = wound healing



**Table S2.** Overview of peer-reviewed studies investigating the effect of teeth resection in suckling piglets.

| Author<br>(year)                 | Setting/<br>Groups (n)                  | Piglet age | Technique(s)<br>(n)       | Other<br>procedures<br>performed<br>(n) | Investigated<br>parameters |    |    |     | Main findings                                                                                                                                                                                                                       |
|----------------------------------|-----------------------------------------|------------|---------------------------|-----------------------------------------|----------------------------|----|----|-----|-------------------------------------------------------------------------------------------------------------------------------------------------------------------------------------------------------------------------------------|
|                                  |                                         |            |                           |                                         | B&V                        | PP | WH | G&V |                                                                                                                                                                                                                                     |
| Bates <i>et al.</i><br>(2002)    | TR (1592),<br>CON (1602)                | 0 d        | CLIP                      | TD, EN,<br>CAS, IA                      |                            |    | X  | X   | <b>Long-term</b><br>-Higher mortality ( $p < 0.001$ ) in CLIP than in CON (parity 6+, trend in parity 1)<br>-Mortality not different between treatments in parity 2–5 females<br>-CON: higher ( $p < 0.001$ ) face scores than CLIP |
| Boyle <i>et al.</i><br>(2002)    | TR (12<br>litters), CON<br>(12 litters) | 0 d        | CLIP                      | EN, TD                                  | X                          |    |    | X   | <b>Short- and long-term</b><br>-CON: more walking/running/playing on d 5 and 15<br>-CLIP: longer sleeping than CON on d 15                                                                                                          |
| Brookes and<br>Lean (1993)       | TR (20),<br>CON (10)                    | 0 d        | CLIP (10),<br>GRIND (10), | -                                       | X                          |    | X  | X   | <b>Short- and long-term</b><br>-No weight differences between treatments ( $p > 0.05$ )<br>-CON: more face wounds; least wounding in CLIP ( $p < 0.01$ )                                                                            |
| Brown <i>et al.</i><br>(1996)    | TR, SHAM<br>(total: 550)                | 0 d        | CLIP                      | BS                                      | X                          |    | X  | X   | <b>Short- and long-term</b><br>-Higher facial lesion scores at d 7, 14, 22 in CON<br>-No effect on survival or weight gain                                                                                                          |
| Fraser and<br>Thompson<br>(1991) | TR (50), CON<br>(42)                    | 0 d        | CLIP                      | -                                       | X                          |    | X  | X   | <b>Short- and long-term</b><br>-Facial wounding more in CON<br>-Wounding/fighting more among large litters ( $p < 0.05$ ).<br>-No differences in weight gain to w 3<br>-No gross differences in development of suckling order       |
| Fu <i>et al.</i><br>(2018)       | TR (152),<br>SHAM (150)                 | 3 d        | CLIP                      | TD (75),<br>SHAMTD<br>(77)              |                            | X  |    | X   | <b>Long-term</b><br>-More social interactions in CLIP<br>-CON: higher respiration rate<br>-No effect on body weight and mortality between 30–85 d                                                                                   |
| Fu <i>et al.</i><br>(2019)       | TR (151),<br>SHAM (74)                  | 3 d        | CLIP                      | TD (75),<br>SHAMTD<br>(76)              | X                          | X  | X  |     | <b>Acute</b><br>-Heart rates increased ( $p < 0.01$ ) in CLIP<br>-CLIP: decreased body surface temperature ( $p < 0.01$ )<br><b>Short- and long-term</b>                                                                            |



| Author<br>(year)                   | Setting/<br>Groups (n)                  | Piglet age | Technique(s)<br>(n)                           | Other<br>procedures<br>performed<br>(n) | Investigated<br>parameters |    |    |     | Main findings                                                                                                                                                                                                                                                                                                              |
|------------------------------------|-----------------------------------------|------------|-----------------------------------------------|-----------------------------------------|----------------------------|----|----|-----|----------------------------------------------------------------------------------------------------------------------------------------------------------------------------------------------------------------------------------------------------------------------------------------------------------------------------|
|                                    |                                         |            |                                               |                                         | B&V                        | PP | WH | G&V |                                                                                                                                                                                                                                                                                                                            |
|                                    |                                         |            |                                               |                                         |                            |    |    |     | -CLIP: more ( $p < 0.05$ ) time lying alone and playing/fighting than SHAM; lower lesion scores on teats ( $p < 0.05$ )                                                                                                                                                                                                    |
| Gallois <i>et al.</i><br>(2005)    | TR (70<br>litters), CON<br>(35 litters) | 0 d        | CLIP (35 litters),<br>GRIND<br>(35 litters)   | -                                       |                            |    | X  | X   | <b>Long-term</b><br>-Litter size and weight on d 0 and 27 similar<br>-Skin lesions: more frequent/severe in CON on d 8 and 27, intermediate in GRIND<br>-Similar teeth length in CLIP and GRIND ( $p > 0.1$ )                                                                                                              |
| Hansson and<br>Lundeheim<br>(2012) | TR (28<br>litters), CON<br>(36 litters) | 0 d        | GRIND                                         | -                                       |                            |    | X  | X   | <b>Short- and long-term</b><br>-No effect of treatment on facial lesion score<br>-Facial lesion scores higher in w 1 than in w 2 ( $p < 0.001$ ), higher in large litters ( $p = 0.003$ )<br>-Mortality between w 1 and w 2 higher in CON ( $p = 0.02$ )                                                                   |
| Hay <i>et al.</i><br>(2004)        | TR/CON (20)                             | 1–2 d      | CLIP + GRIND +<br>CON (all in each<br>piglet) | -                                       |                            |    | X  |     | <b>Short- and long-term</b><br>-TR: lesions such as pulp cavity opening, fracture, hemorrhage, infiltration or abscess; sooner/more severe in CLIP                                                                                                                                                                         |
| Hessling-<br>Zeinen (2014)         | TR (87)                                 | 0 d        | GRIND                                         | -                                       |                            |    | X  |     | <b>Short-term</b><br>-Open teeth in > 90% of examined animals<br>-45% of all pulp cavities opened<br>-GRIND: opening of pulp cavities in nearly all piglets<br>-Differences between farms ( $p < 0.05$ )                                                                                                                   |
| Holyoake <i>et al.</i> (2004)      | TR, CON<br>(total: 135<br>litters)      | 0 d        | CLIP (71 litters),<br>GRIND (64<br>litters)   | -                                       |                            |    | X  | X   | <b>Short- and long-term</b><br>-CLIP: higher weaning weight than GRIND; not than CON<br>-CLIP: fewer preweaning deaths than both CON and GRIND (fewer overlays)<br>-Higher incidence/severity of face wounds in CON than CLIP/GROUND<br>-No treatment effect on face scars at weaning, udder damage, deaths or weight gain |
| Hutter <i>et al.</i><br>(1993)     | TR (490),<br>CON (306)                  | 0 d        | CLIP (182),<br>GRIND (308)                    | -                                       |                            |    | X  | X   | <b>Short- and long-term</b><br>-48% of GRIND teeth with inflammation                                                                                                                                                                                                                                                       |



| Author<br>(year)                    | Setting/<br>Groups (n)                | Piglet age                            | Technique(s)<br>(n)                      | Other<br>procedures<br>performed<br>(n) | Investigated<br>parameters |    |    |     | Main findings                                                                                                                                                                                                                                                                                                                                         |
|-------------------------------------|---------------------------------------|---------------------------------------|------------------------------------------|-----------------------------------------|----------------------------|----|----|-----|-------------------------------------------------------------------------------------------------------------------------------------------------------------------------------------------------------------------------------------------------------------------------------------------------------------------------------------------------------|
|                                     |                                       |                                       |                                          |                                         | B&V                        | PP | WH | G&V |                                                                                                                                                                                                                                                                                                                                                       |
|                                     |                                       |                                       |                                          |                                         |                            |    |    |     | -CLIP: pulpitis in 92% of teeth; inflammation of gingiva; splinters<br>-Bites more frequent in CON than in TR<br>-Lowest mortality in CLIP                                                                                                                                                                                                            |
| Kober and Thacker (1999)            | TR (84 litters)                       | 1 d (43 litters),<br>2 d (41 litters) | CLIP                                     | TD, IA                                  |                            |    |    | X   | <b>Long-term</b><br>-Mortality lower for d 1-piglets ( $p < 0.05$ )<br>Litter and piglet weight higher in d 1-piglets at weaning ( $p < 0.05$ )                                                                                                                                                                                                       |
| Lewis <i>et al.</i> (2005)          | TR (40 litters), CON (20 litters)     | 0 d                                   | CLIP (20 litters),<br>GRIND (20 litters) | EN                                      | X                          |    | X  | X   | <b>Acute</b><br>-CLIP more chomping than CON after 5 min ( $p = 0.05$ )<br><b>Short-term</b><br>-After 30 min CON more active than TR ( $p < 0.05$ )<br><b>Long-term</b><br>-D 21: CON more active than GRIND ( $p < 0.05$ )<br>-D 26: GRIND more inactive than CON and CLIP ( $p < 0.05$ )<br>-D 14/26, CLIP more sleeping than GRIND ( $p = 0.05$ ) |
| Llamas Moya <i>et al.</i> (2006)    | TR, CON (total: 60 litters)           | 0 d                                   | CLIP, GRIND                              | EN, BS                                  |                            | X  | X  |     | <b>Short-term</b><br>-No difference in C reactive protein/serum amyloid A on d 1<br><b>Long-term</b><br>-Concentrations higher on d 29<br>-CLIP: higher C reactive protein than GRIND on d 29                                                                                                                                                         |
| Llamas Moya <i>et al.</i> (2007)    | TR, CON (total: 96 piglets)           | 0 d                                   | CLIP                                     | EN, TD, BS                              |                            | X  |    |     | <b>Short-term</b><br>-TR: tended to have higher levels of plasma Haptoglobin than CON, no other differences<br>-age effects were not affected by processing; no systemic inflammation in early life due to processing                                                                                                                                 |
| Marchant-Forde <i>et al.</i> (2009) | TR (32), SHAM + blood (16), SHAM (16) | 2–3 d                                 | CLIP (16),<br>GRIND (16)                 | BS                                      | X                          | X  | X  | X   | <b>Acute</b><br>-GRIND longer duration than CLIP; greater cortisol concentration<br>-longer vocalizations than SHAM groups ( $p < 0.05$ )                                                                                                                                                                                                             |



| Author<br>(year)                           | Setting/<br>Groups (n)                         | Piglet age | Technique(s)<br>(n)      | Other<br>procedures<br>performed<br>(n)                                                    | Investigated<br>parameters |    |    |     | Main findings                                                                                                                                                                                                                                                                                                                                                                      |
|--------------------------------------------|------------------------------------------------|------------|--------------------------|--------------------------------------------------------------------------------------------|----------------------------|----|----|-----|------------------------------------------------------------------------------------------------------------------------------------------------------------------------------------------------------------------------------------------------------------------------------------------------------------------------------------------------------------------------------------|
|                                            |                                                |            |                          |                                                                                            | B&V                        | PP | WH | G&V |                                                                                                                                                                                                                                                                                                                                                                                    |
|                                            |                                                |            |                          |                                                                                            |                            |    |    |     | <b>Short- and long-term</b><br>-TR: poorer growth than SHAM groups ( $p < 0.05$ )                                                                                                                                                                                                                                                                                                  |
| Marchant-<br>Forde <i>et al.</i><br>(2014) | TR (40),<br>SHAM +<br>blood (20),<br>SHAM (20) | 2–3 d      | CLIP (20),<br>GRIND (20) | ID (EN or<br>ET), IA (INJ<br>or ORAL),<br>CAS (CUT or<br>PULL), TD<br>(HOT or<br>COLD), BS | X                          | X  | X  | X   | <b>Acute</b><br>-TR longer duration than SHAM; more vocalizations, escape<br>attempts ( $p < 0.05$ )<br><b>Short- and long-term</b><br>-Cortisol after 45 min higher in TR than in SHAM groups<br>( $p < 0.05$ )<br>-More Stressful took longer; higher $\beta$ -endorphin at w 1<br>-Growth during d 2 to 7 lower in More Stressful than SHAM<br>( $p < 0.05$ ); by w 2 no effect |
| Menegatti <i>et al.</i><br>(2018)          | TR, CON<br>(total: 15<br>litters)              | 0 d        | CLIP, GRIND              | -                                                                                          |                            | X  | X  | X   | <b>Short-term</b><br>-W 1: GRIND higher weight gain<br>-After d 4: CLIP/GRIND reduced facial lesions<br>-No effect on blood serum protein<br>-W 2: CLIP worst weight gain<br>-W 1–2: CLIP worse weight gain than GRIND<br>-Mortality not influenced"                                                                                                                               |
| Meunier-<br>Salaün <i>et al.</i><br>(2002) | TR, SHAM,<br>CON (total:<br>152)               | 1 d        | CLIP, GRIND              | -                                                                                          | X                          | X  |    |     | <b>Acute</b><br>-GRIND: more leg movements<br>-More chewing behavior in TR<br><b>Short- and long-term</b><br>-D 1: similar resting, standing or activity at sow’s udder similar<br>-D 7: more lip lesions in TR; CLIP lower weight than CON<br>-TR no effect on plasma cortisol, ACTH, glucose and lactate                                                                         |
| Noonan <i>et al.</i><br>(1994)             | TR (111),<br>SHAM (56)                         | 1–3 d      | CLIP                     | EN (56), TD<br>(55)                                                                        | X                          |    |    |     | <b>Short-term</b><br>-Processed piglets: different behavior ( $p < 0.05$ ); CLIP: teeth<br>champing<br>-Restraint also stressful<br>-No age effect                                                                                                                                                                                                                                 |



| Author<br>(year)                 | Setting/<br>Groups (n)             | Piglet age | Technique(s)<br>(n)      | Other<br>procedures<br>performed<br>(n) | Investigated<br>parameters |    |    |     | Main findings                                                                                                                                                                                                                                                                                                                                          |
|----------------------------------|------------------------------------|------------|--------------------------|-----------------------------------------|----------------------------|----|----|-----|--------------------------------------------------------------------------------------------------------------------------------------------------------------------------------------------------------------------------------------------------------------------------------------------------------------------------------------------------------|
|                                  |                                    |            |                          |                                         | B&V                        | PP | WH | G&V |                                                                                                                                                                                                                                                                                                                                                        |
| Prunier <i>et al.</i><br>(2005)  | TR (13),<br>SHAM (7),<br>CON (7)   | 1 d        | CLIP (6),<br>GRIND (7)   | BS                                      |                            | X  |    |     | <b>Short-term</b><br>-Plasma lactate higher in GRIND than in SHAM and CLIP, intermediate in CON<br>-TR no effect on plasma cortisol, ACTH, glucose, lactate                                                                                                                                                                                            |
| Robert <i>et al.</i><br>(1995)   | TR, CON<br>(total: 346<br>litters) | 1 d        | CLIP                     | EN                                      |                            |    |    | X   | <b>Long-term</b><br>-In large litters: lower-birth-weight piglets (CLIP) lower mortality<br>-Within-litter variance of 21-d weights smaller ( $p < 0.00$ ) in CLIP                                                                                                                                                                                     |
| Sinclair <i>et al.</i><br>(2016) | TR, SHAM<br>(total: 102)           | 1 d        | CLIP, GRIND              | -                                       | X                          | X  |    |     | <b>Acute</b><br>-A treatment*time effect for standing ( $p < 0.0001$ ), investigating ( $p = 0.0152$ )<br><b>Short- and long-term</b><br>-D 1: lower standing duration in GRIND, SHAM intermediate; higher inactivity in GRIND ( $p = 0.003$ )<br>-No effect for walking, oral behaviors, number of agnostic behaviors<br>-No effects on d 5, 12 or 26 |
| Sinclair <i>et al.</i><br>(2018) | TR (32),<br>SHAM (16)              | -          | CLIP (16),<br>GRIND (16) | -                                       |                            |    | X  |     | <b>Short- and long-term</b><br>-All TR: pulp exposure; higher in CLIP<br>-CXCL8 gene expression increased ( $p < 0.001$ ) in TR<br>-CALCB expression downregulated for CLIP ( $p < 0.001$ ) and GRIND at w 1 ( $p < 0.05$ )                                                                                                                            |
| Sinclair <i>et al.</i><br>(2019) | TR (80),<br>SHAM (40)              | 1 d        | CLIP (40),<br>GRIND (40) | -                                       | X                          |    |    |     | <b>Acute</b><br>-Minor bleeding after TR, higher in CLIP<br><b>Short-term</b><br>-Exploring higher in SHAM than in CLIP, GRIND intermediate<br>-Champing never before, but after TR different between SHAM and CLIP ( $p < 0.05$ ), GRIND intermediate<br>-After TR: walking, exploring, ears back decreased ( $p < 0.05$ ).                           |



| Author<br>(year)                     | Setting/<br>Groups (n)       | Piglet age | Technique(s)<br>(n)        | Other<br>procedures<br>performed<br>(n) | Investigated<br>parameters |    |    |     | Main findings                                                                                                                                                                                                                                                                                                                                                                                                                                                                                                                                                                                                                              |
|--------------------------------------|------------------------------|------------|----------------------------|-----------------------------------------|----------------------------|----|----|-----|--------------------------------------------------------------------------------------------------------------------------------------------------------------------------------------------------------------------------------------------------------------------------------------------------------------------------------------------------------------------------------------------------------------------------------------------------------------------------------------------------------------------------------------------------------------------------------------------------------------------------------------------|
|                                      |                              |            |                            |                                         | B&V                        | PP | WH | G&V |                                                                                                                                                                                                                                                                                                                                                                                                                                                                                                                                                                                                                                            |
| van Beirendonck <i>et al.</i> (2012) | TR (total: 251),<br>CON (44) | 1 d        | GRIND                      | ET, TD, CAS, IA                         | X                          |    | X  | X   | <b>Short-term</b><br>-Differences in behavior, but weight at weaning between GRIND and CON not different<br>-Mortality higher in lightest piglets, higher in GRIND                                                                                                                                                                                                                                                                                                                                                                                                                                                                         |
| Weary and Fraser (1999)              | TR, CON<br>(total: 553)      | 0 d        | CLIP partly,<br>CLIP fully | -                                       |                            |    | X  | X   | <b>Short- and long-term</b><br>-W 1: highest weight gain in CON, CLIP partly intermediate ( $p < 0.02$ ); no effect on later weight, deaths, suckling position<br>-Facial lesions: negligible in partly and fully CLIP, greater in CON ( $p < 0.02$ )                                                                                                                                                                                                                                                                                                                                                                                      |
| Zhou <i>et al.</i> (2013)            | TR (63),<br>SHAM (63)        | 3 d        | CLIP                       | TD                                      | X                          | X  | X  | X   | <b>Acute</b><br>-CLIP more vocalization ( $p < 0.01$ )<br><b>Short- and long-term</b><br>-CLIP: more lying alone ( $p = 0.03$ ) during entire suckling period<br>-CLIP did not ( $p \geq 0.14$ ) alter suckling, standing, huddling, playing/fighting, sitting during d 1–3 and d 5–15<br>-CLIP: more resting ( $p = 0.03$ ), less ( $p \leq 0.01$ ) interested in exploratory behaviors; reduced weight gain between d 10–21 d ( $p = 0.01$ ) and 21–70 d ( $p = 0.04$ )<br>-D 160 weight not affected by CLIP ( $p = 0.62$ ); no difference between SHAM and CLIP for fat ( $p \geq 0.05$ ), LM ( $p = 0.93$ ), or muscle ( $p = 0.27$ ) |

a. o. = and others; BS = blood sampling; B&V = Behavior & vocalization; CAS = castration; CON = control piglets (not handled); d = days; EN = ear notching; G&V = growth & vitality; IA = iron application; INJ = injection; m = months; PP = physiological parameters; SHAM = sham-handled piglets; TD = tail docking; TR = teeth resection; w = weeks; WH = wound healing.



**Table S3.** Overview of peer-reviewed studies investigating the effect of tail docking in suckling piglets.

| Author<br>(year)                     | Setting/<br>Groups (n)                 | Piglet age            | Technique(s)<br>(n)                                    | Other<br>procedures<br>performed<br>(n) | Investigated<br>parameters |    |    |     | Main findings                                                                                                                                                                                                                                                                                                                                                                                                   |
|--------------------------------------|----------------------------------------|-----------------------|--------------------------------------------------------|-----------------------------------------|----------------------------|----|----|-----|-----------------------------------------------------------------------------------------------------------------------------------------------------------------------------------------------------------------------------------------------------------------------------------------------------------------------------------------------------------------------------------------------------------------|
|                                      |                                        |                       |                                                        |                                         | B&V                        | PP | WH | G&V |                                                                                                                                                                                                                                                                                                                                                                                                                 |
| Bovey <i>et al.</i><br>(2014)        | TD < 1 kg<br>(40), TD ≥<br>1.2 kg (80) | 1 d (60),<br>3 d (60) | COLD                                                   | EN, BS                                  | X                          | X  |    | X   | <b>Acute</b><br>-Light piglets fewer calls ( $p < 0.05$ ), heavier piglets processed on d 3 higher frequency ( $p = 0.05$ )<br><b>Short- and long-term</b><br>-More dog-sitting, less lying, more isolation, less sucking (males) in light group ( $p < 0.01$ )<br>-Immunoglobulins lower in light group regardless of age at processing ( $p \leq 0.06$ )<br>-Higher mortality in light piglets ( $p < 0.01$ ) |
| Cordeiro <i>et al.</i><br>(2018)     | TD (20)                                | 7 d                   | HOT                                                    | EN, CAS<br>(PULL)                       | X                          |    |    |     | <b>Acute</b><br>-Lower signal intensity during handling than during EN, TD, CAS<br>-Signal duration increased with handling, EN, TD, CAS                                                                                                                                                                                                                                                                        |
| Di Giminiani<br><i>et al.</i> (2016) | TD (8)                                 | 3 d                   | HOT                                                    | -                                       | X                          |    |    |     | <b>Short-term</b><br>-TD: change ( $p < 0.05$ ) only in the “orbital tightening” facial action unit                                                                                                                                                                                                                                                                                                             |
| Di Giminiani<br><i>et al.</i> (2017) | TD, SHAM<br>(total: 126)               | 3 d                   | HOT (10),<br>COLD (10), TD<br>long (24),<br>short (24) | -                                       | X                          |    | X  |     | <b>Acute</b><br>-Greater call energy and intensity in TD<br><b>Short-term</b><br>-No difference in activity up to 48 h post-procedure<br><b>Long-term</b><br>-No difference in mechanical nociceptive thresholds indicative of long-term pain observed at 17 w                                                                                                                                                  |
| Di Martino <i>et al.</i><br>(2015)   | TD (128),<br>CON (320)                 | 5 d                   | HOT                                                    | CAS                                     | X                          | X  | X  | X   | <b>Long-term</b><br>-TD no different blood parameters<br>-Higher cortisol in CON females than in TD females; higher cortisol in TD males than in CON males ( $p < 0.04$ )<br>-CON: more tail lesions; less belly nosing                                                                                                                                                                                         |



| Author<br>(year)                    | Setting/<br>Groups (n)            | Piglet age                               | Technique(s)<br>(n)                                | Other<br>procedures<br>performed<br>(n) | Investigated<br>parameters |    |    |     | Main findings                                                                                                                                                                                                                                     |
|-------------------------------------|-----------------------------------|------------------------------------------|----------------------------------------------------|-----------------------------------------|----------------------------|----|----|-----|---------------------------------------------------------------------------------------------------------------------------------------------------------------------------------------------------------------------------------------------------|
|                                     |                                   |                                          |                                                    |                                         | B&V                        | PP | WH | G&V |                                                                                                                                                                                                                                                   |
|                                     |                                   |                                          |                                                    |                                         |                            |    |    |     | -CON: less explorative activity ( $p < 0.05$ ); more lying behavior ( $p < 0.02$ ).                                                                                                                                                               |
| Fu <i>et al.</i><br>(2018)          | TD (151),<br>SHAM<br>(150)        | 3 d                                      | -                                                  | TR (75),<br>SHAMTR<br>(74)              |                            | X  |    | X   | <b>Long-term</b><br>-More social interactions in TD, fewer lesions on tail<br>-CON: higher respiration rate<br>-No effect on body weight and mortality between 30–85 d                                                                            |
| Fu <i>et al.</i><br>(2019)          | TD (152),<br>SHAM<br>TD/TR (74)   | 3 d                                      | HOT                                                | TR (75),<br>SHAMTR<br>(77)              | X                          | X  | X  |     | <b>Acute</b><br>-Heart rates increased ( $p < 0.01$ ) during TD<br>-TD: no decreased body surface temperature<br><b>Short- and long-term</b><br>-TD: more ( $p < 0.05$ ) time lying alone and playing/fighting than SHAM<br>-Lower impact than TR |
| Herskin <i>et al.</i><br>(2015)     | TD (47),<br>CON (18)              | 2–4 d                                    | HOT; TD 75%<br>(17), 50% (19),<br>25% (11) of tail | -                                       |                            |    | X  |     | <b>Short and long-term</b><br>-TD: more tails with neuromas, increased size and number of neuromas ( $p < 0.001$ )<br>-No neuroanatomical differences between docking lengths                                                                     |
| Herskin <i>et al.</i><br>(2016)     | TD (70),<br>CON (57),<br>a. o.    | 2–4 d                                    | HOT; TD 75%,<br>50%, 25% of tail                   | -                                       | X                          |    |    |     | <b>Short-term</b><br>-TD: behavioural changes, persistent effects through 5 h<br>-More squealing, sudden jerking in TD than in SHAM<br>-Increased likelihood of squealing with increasing tail removal                                            |
| Kober and<br>Thacker<br>(1999)      | TD (84<br>litters)                | 1 d (43<br>litters), 2 d<br>(41 litters) | -                                                  | TR (CLIP),<br>IA                        |                            |    |    | X   | <b>Long-term</b><br>-Mortality lower for d 1-piglets ( $p < 0.05$ )<br>-Litter and piglet weight higher in d 1-piglets at weaning ( $p < 0.05$ )                                                                                                  |
| Llamas Moya<br><i>et al.</i> (2007) | TD, CON<br>(total: 96<br>piglets) | 0 d                                      | -                                                  | EN, TR, BS                              |                            | X  |    |     | <b>Short-term</b><br>-TR: tended to have higher levels of plasma Haptoglobin than CON, no other differences<br>-age effects were not affected by processing; no systemic inflammation in early life due to processing                             |



| Author<br>(year)                           | Setting/<br>Groups (n)                         | Piglet age | Technique(s)<br>(n)    | Other<br>procedures<br>performed<br>(n)                                                      | Investigated<br>parameters |    |    |     | Main findings                                                                                                                                                                                                                                                                                                                                                                                                                                 |
|--------------------------------------------|------------------------------------------------|------------|------------------------|----------------------------------------------------------------------------------------------|----------------------------|----|----|-----|-----------------------------------------------------------------------------------------------------------------------------------------------------------------------------------------------------------------------------------------------------------------------------------------------------------------------------------------------------------------------------------------------------------------------------------------------|
|                                            |                                                |            |                        |                                                                                              | B&V                        | PP | WH | G&V |                                                                                                                                                                                                                                                                                                                                                                                                                                               |
| Lecchi <i>et al.</i><br>(2020)             | TD (12),<br>SHAM (12),<br>a. o.                | 4 d        | HOT                    | CAS, IA, SS                                                                                  |                            | X  |    |     | <b>Short-term findings:</b><br>-TD: salivary cortisol increased<br>-Abundance increase of miR-19b, miR-27b, miR-365 in saliva of TD<br>-No differences in SHAM                                                                                                                                                                                                                                                                                |
| Marchant-<br>Forde <i>et al.</i><br>(2009) | TD (32),<br>SHAM +<br>blood (16),<br>SHAM (16) | 2–3 d      | HOT (16),<br>COLD (16) | BS                                                                                           | X                          | X  | X  | X   | <b>Acute</b><br>-HOT longer duration than COLD; longer and higher frequency<br>squealing compared with SHAM groups<br><b>Short- and long-term</b><br>-HOT: slower growth than COLD ( $p < 0.01$ )                                                                                                                                                                                                                                             |
| Marchant-<br>Forde <i>et al.</i><br>(2014) | TD (40),<br>SHAM +<br>blood (20),<br>SHAM (20) | 2–3 d      | HOT (20),<br>COLD (20) | ID (EN or<br>ET), IA (INJ<br>or ORAL),<br>CAS (CUT or<br>PULL), TR<br>(CLIP or<br>GRIND), BS | X                          | X  | X  | X   | <b>Acute</b><br>-TD longer duration than SHAM; more vocalizations, escape<br>attempts ( $p < 0.05$ )<br><b>Short- and long-term</b><br>-Cortisol after 45 min higher in TD than in SHAM groups ( $p < 0.05$ )<br>-More Stressful (HOT) took longer; higher $\beta$ -endorphin at w 1 and<br>increased tail wound scores ( $p < 0.01$ )<br>-Growth during d 2 to 7 lower in More Stressful (HOT) than<br>SHAM ( $p < 0.05$ ); by w 2 no effect |
| Morrison<br>and<br>Hemsworth<br>(2020a)    | TD, SHAM,<br>a. o. (total:<br>288)             | 2 d        | HOT, COLD              | BS                                                                                           | X                          | X  |    |     | <b>Acute</b><br>-Duration of vocalization and escape attempts greater during CAS<br>than SHAM and TD<br><b>Short-term</b><br>-Higher cortisol after 15 min in TD and CAS<br>-30 min: cortisol only higher in COLD and CAS<br>-More pain behavior in TD and CAS at 60 min, but no treatment<br>effect after 24 h                                                                                                                               |
| Morrison<br>and<br>Hemsworth<br>(2020b)    | TD, SHAM,<br>CON, a. o.<br>(total: 432)        | 2 d        | HOT, COLD              | BS                                                                                           | X                          | X  |    |     | <b>Acute</b><br>-Duration of vocalizations and frequency of escape attempts<br>greater in all TD than SHAM<br><b>Short-term</b>                                                                                                                                                                                                                                                                                                               |



| Author<br>(year)                | Setting/<br>Groups (n)                  | Piglet age | Technique(s)<br>(n) | Other<br>procedures<br>performed<br>(n) | Investigated<br>parameters |    |    |     | Main findings                                                                                                                                                                                                                                              |
|---------------------------------|-----------------------------------------|------------|---------------------|-----------------------------------------|----------------------------|----|----|-----|------------------------------------------------------------------------------------------------------------------------------------------------------------------------------------------------------------------------------------------------------------|
|                                 |                                         |            |                     |                                         | B&V                        | PP | WH | G&V |                                                                                                                                                                                                                                                            |
|                                 |                                         |            |                     |                                         |                            |    |    |     | -COLD: higher cortisol at 30 min, but not at 15 min, and stood longer with lowered head                                                                                                                                                                    |
| Noonan <i>et al.</i> (1994)     | TD (111),<br>SHAM (56)                  | 1–3 d      | -                   | EN (56),<br>TR (56)                     | X                          |    |    |     | <b>Acute</b><br>-More grunting during and immediately after procedure in TD<br><b>Short-term</b><br>-Processed piglets: different behavior ( $p < 0.05$ ); TD caused more tail jamming and wagging<br>-Restraint also stressful<br>-No age effect          |
| Numberger <i>et al.</i> (2016)  | TD (30),<br>SHAM (30),<br>a. o.         | 3–4 d      | COLD                | BS                                      |                            | X  |    |     | <b>Short-term</b><br>-At 7 h cortisol back to base values in all groups<br>-ET and CAS greater response than TD<br>-TD: greater cortisol response than SHAM at 30 min                                                                                      |
| Prunier <i>et al.</i> (2001)    | TD, SHAM,<br>CON, a. o.<br>(total: 180) | 1 d        | HOT                 | -                                       | X                          | X  |    | X   | <b>Acute</b><br>-During 20 s after TD, more tail jamming and wagging ( $p < 0.05$ )<br><b>Short-term</b><br>-During 12 h, resting/activity similar between groups<br>-Growth rate in 1 <sup>st</sup> week and injuries at tail not different ( $p > 0.1$ ) |
| Prunier <i>et al.</i> (2005)    | TD, SHAM,<br>CON<br>(total: 17)         | -          | HOT                 | BS                                      |                            | X  |    |     | <b>Short-term</b><br>-No treatment $\times$ time interaction<br>-Glucose lower ( $p < 0.05$ ) in SHAM than in TD and CON                                                                                                                                   |
| Sandercock <i>et al.</i> (2011) | TD, SHAM,<br>a. o.<br>(total: 109)      | 2–4 d      | COLD                | -                                       |                            | X  |    |     | <b>Long-term</b><br>-Exp. 1 (8 w): no altered thresholds to mechanical stimulation after TD<br>-Exp. 2 (5 w): no altered thresholds to mechanical or cold stimulation after TD                                                                             |
| Sandercock <i>et al.</i> (2016) | TD (4)                                  | 3 d        | HOT                 | -                                       |                            |    | X  |     | <b>Long-term</b><br>-Non-neural inflammatory and reparative epidermal and dermal changes associated with tissue thickening and healing                                                                                                                     |



| Author<br>(year)                   | Setting/<br>Groups (n)  | Piglet age                                            | Technique(s)<br>(n)                                      | Other<br>procedures<br>performed<br>(n) | Investigated<br>parameters |    |    |     | Main findings                                                                                                                                                                                                                                                                                                  |
|------------------------------------|-------------------------|-------------------------------------------------------|----------------------------------------------------------|-----------------------------------------|----------------------------|----|----|-----|----------------------------------------------------------------------------------------------------------------------------------------------------------------------------------------------------------------------------------------------------------------------------------------------------------------|
|                                    |                         |                                                       |                                                          |                                         | B&V                        | PP | WH | G&V |                                                                                                                                                                                                                                                                                                                |
|                                    |                         |                                                       |                                                          |                                         |                            |    |    |     | -Mild inflammation present in some; traumatic neuroma after 1 month, still incomplete after 4 months                                                                                                                                                                                                           |
| Sandercock<br><i>et al.</i> (2019) | TD (48),<br>SHAM (48)   | 3 d, 63 d                                             | HOT                                                      | -                                       |                            | X  | X  | X   | <b>Long-term</b><br>-TD: changes in gene expression (up and down) compared to SHAM (all ages)<br>-Changes in gene expression in TD evident 4 months after tail injury<br>-No long-term alterations of nociception in pigs                                                                                      |
| Simonsen <i>et al.</i> (1991)      | TD (30),<br>CON (10)    | 1 d (TD),<br>> 90 kg<br>(TD+CAS),<br>> 90 kg<br>(CON) | COLD                                                     | -                                       |                            | X  | X  |     | <b>Short- and long-term</b><br>-Both ages: peripheral nerves unevenly distributed, regressive changes; traumatic neuromas indicating increased sensitivity in stump                                                                                                                                            |
| Simonsen<br>(1995)                 | TD, CON<br>(total: 576) | 1 d                                                   | COLD                                                     | -                                       | X                          | X  |    |     | <b>Long-term</b><br>-Tail status no effect on nibbling and tail biting                                                                                                                                                                                                                                         |
| Sutherland <i>et al.</i> (2008)    | TD (40),<br>CON (40)    | 6 d                                                   | HOT (20),<br>COLD (20)                                   | BS                                      | X                          | X  |    |     | <b>Short-term</b><br>-TD: more ( $p < 0.07$ ) sitting than CON at 0–15 min<br>-White blood cells reduced ( $p < 0.05$ ) in TD compared to CON at 30 min<br>-Cortisol: higher ( $p < 0.01$ ) among COLD compared with CON and HOT at 60 min<br>-TD more ( $p < 0.05$ ) scooting than CON at 0–15 min, 31–45 min |
| Sutherland <i>et al.</i> (2009)    | TD (40),<br>CON (40)    | 6 d                                                   | HOT (20),<br>COLD (20) (Exp. 1); SHORT,<br>LONG (Exp. 2) | BS                                      |                            | X  | X  |     | <b>Long-term</b><br>-Tail-biting lesions similar at 3 and 5 weeks<br>-7 weeks: lesions greater among CON compared to TD<br>-Bodyweights lower in CON compared to TD<br>-C reactive protein elevated in CON compared to TD at 7 weeks<br>-Tail-biting lesions greater in LONG than in SHORT tails               |



| Author<br>(year)                     | Setting/<br>Groups (n)             | Piglet age | Technique(s)<br>(n) | Other<br>procedures<br>performed<br>(n) | Investigated<br>parameters |    |    |     | Main findings                                                                                                                                                                                                                                                                                                                                                                                                                                                                                 |
|--------------------------------------|------------------------------------|------------|---------------------|-----------------------------------------|----------------------------|----|----|-----|-----------------------------------------------------------------------------------------------------------------------------------------------------------------------------------------------------------------------------------------------------------------------------------------------------------------------------------------------------------------------------------------------------------------------------------------------------------------------------------------------|
|                                      |                                    |            |                     |                                         | B&V                        | PP | WH | G&V |                                                                                                                                                                                                                                                                                                                                                                                                                                                                                               |
| Sutherland <i>et al.</i> (2011)      | TD (20),<br>SHAM (20),<br>a. o.    | 3 d        | COLD                | BS                                      | X                          | X  | X  | X   | <b>Acute</b><br>-Stress vocalizations increased in TD compared to TD<br><b>Short-term</b><br>-Neutrophil/lymphocyte ratio greater in TD than in SHAM<br>-Cortisol higher in CUT at 30 min<br>-More TD pigs lying without contact than SHAM<br><b>Long-term</b><br>-Body weight and wound scores did not differ between treatments                                                                                                                                                             |
| Tallet <i>et al.</i> (2019)          | TD (48),<br>SHAM (50),<br>CON (47) | 1–3 d      | HOT                 | -                                       | X                          |    |    | X   | <b>Acute</b><br>-TD more screaming, higher intensity ( $p < 0.05$ ) than SHAM<br>-TD: ears perpendicular to the head-tail axis; more changes in ear posture ( $p < 0.05$ )                                                                                                                                                                                                                                                                                                                    |
| Torrey <i>et al.</i> (2009)          | TD (40),<br>SHAM (40),<br>CON (40) | 1 d, 3 d   | COLD                | EN, BS                                  | X                          | X  |    | X   | <b>Acute</b><br>-TD (all ages): greater frequency ( $p < 0.001$ ) and more high frequency calls ( $p = 0.016$ ) than SHAM<br>-D 1: more high frequency calls than on d 3 ( $p = 0.047$ )<br><b>Short-term</b><br>-SHAM and TD: less time lying and more time standing than CON ( $p < 0.001$ )<br>-TD: more tail jamming than SHAM or CON ( $p < 0.001$ )<br>-Lying, standing and tail posture not influenced by age<br>-More trembling in d 1 piglets than in piglets on d 3 ( $p < 0.001$ ) |
| Übel <i>et al.</i> (2015)            | TD, SHAM,<br>a. o.                 | 3–4 d      | COLD                | ET, CAS, IA,<br>BS                      | X                          | X  |    |     | <b>Short-term</b><br>-Higher cortisol for 4 h after CAS + TD + ET than after CAS and SHAM<br>-Weights not different 4 d after SHAM and CAS + TD + ET                                                                                                                                                                                                                                                                                                                                          |
| van Beirendonck <i>et al.</i> (2012) | TD (total: 251), CON (44)          | 1 d        | -                   | ET, TR, IA                              | X                          |    | X  | X   | <b>Short- and long-term</b><br>-Differences in behavior, but weight at weaning not different<br>-Mortality higher in lightest piglets                                                                                                                                                                                                                                                                                                                                                         |



| Author<br>(year)                 | Setting/<br>Groups (n)                      | Piglet age | Technique(s)<br>(n) | Other<br>procedures<br>performed<br>(n) | Investigated<br>parameters |    |    |     | Main findings                                                                                                                                                                                                                                                                                                                                                                                                                                                                                                                                                                                                                     |
|----------------------------------|---------------------------------------------|------------|---------------------|-----------------------------------------|----------------------------|----|----|-----|-----------------------------------------------------------------------------------------------------------------------------------------------------------------------------------------------------------------------------------------------------------------------------------------------------------------------------------------------------------------------------------------------------------------------------------------------------------------------------------------------------------------------------------------------------------------------------------------------------------------------------------|
|                                  |                                             |            |                     |                                         | B&V                        | PP | WH | G&V |                                                                                                                                                                                                                                                                                                                                                                                                                                                                                                                                                                                                                                   |
| Viscardi <i>et al.</i><br>(2017) | CAS + TD<br>(2), CAS +<br>TD +<br>NaClA (5) | 5 d        | 1 INC, PULL         | TD (COLD),<br>IA                        | X                          |    |    |     | <b>Short-term</b><br>-More inactive behaviors up to 6 h post-CAS and TD<br>-Behavioral changes up to 7 h post-CAS compared to baseline<br>-Higher grimace scores at 0, 3, 4, 5 h post-CAS compared to scores at 7 h                                                                                                                                                                                                                                                                                                                                                                                                               |
| Viscardi and<br>Turner (2019)    | TD (30),<br>SHAM (15),<br>a. o.             | 4 d        | COLD                | -                                       | X                          |    |    |     | <b>Acute</b><br>-TD: higher vocalizations than SHAM ( $p < 0.05$ )<br><b>Short-term</b><br>-More grimacing in TD than in SHAM ( $p = 0.02$ )                                                                                                                                                                                                                                                                                                                                                                                                                                                                                      |
| Vitali <i>et al.</i><br>(2020)   | TD, CON                                     | 3–6 d      | -                   | CAS                                     | X                          |    |    |     | <b>Long-term</b><br>-Tear staining higher in TD than in CON ( $p = 0.05$ )<br>-CON: higher Qualitative Behavior Assessment score than TD piglets ( $p = 0.01$ )<br>-Tail lesion score index not influenced by TD                                                                                                                                                                                                                                                                                                                                                                                                                  |
| Zhou <i>et al.</i><br>(2013)     | TD (63),<br>SHAM (63)                       | 3 d        | COLD                | TR                                      | X                          | X  | X  | X   | <b>Acute</b><br>-TD more vocalization ( $p < 0.01$ )<br><b>Short- and long-term</b><br>-TD: more lying alone ( $p = 0.03$ ) during entire suckling period<br>-TD no alteration of ( $p \geq 0.14$ ) suckling, standing, huddling, playing/fighting, sitting during d 1–3 and d 5–15<br>-TD: more resting ( $p = 0.03$ ), less ( $p \leq 0.01$ ) interested in exploratory behaviors; reduced weight gain between d 10–21 d ( $p = 0.01$ ) and 21–70 d ( $p = 0.04$ )<br>-D 160 weight not affected by TD ( $p = 0.62$ ); no difference between SHAM and TD for fat ( $p \geq 0.05$ ), LM ( $p = 0.93$ ), or muscle ( $p = 0.27$ ) |

a. o. = and others; BS = blood sampling; B&V = Behavior & vocalization; CAS = castration; CON = control piglets (not handled); COLD = cold tail docking (side cutters); d = days; EN = ear notching; ET = ear tagging; Exp. = experiment; G&V = growth & vitality; HOT = hot tail docking (cautery); IA = iron application; INJ = injection; m = months; PP = physiological parameters; SHAM = sham-handled piglets; SS = salivary sample; TD = tail docking; TR = teeth resection; w = weeks; WH = wound healing.



**Table S4.** Overview of peer-reviewed studies investigating the effect of castration in suckling piglets.

| Author<br>(year)                   | Setting/<br>Groups (n)                                  | Piglet age<br>(n)                                | Technique(s) (n) | Other<br>procedures<br>performed (n) | Investigated<br>parameters |    |    |     | Main findings                                                                                                                                                                                                                                                                                                                                                                                              |
|------------------------------------|---------------------------------------------------------|--------------------------------------------------|------------------|--------------------------------------|----------------------------|----|----|-----|------------------------------------------------------------------------------------------------------------------------------------------------------------------------------------------------------------------------------------------------------------------------------------------------------------------------------------------------------------------------------------------------------------|
|                                    |                                                         |                                                  |                  |                                      | B&V                        | PP | WH | G&V |                                                                                                                                                                                                                                                                                                                                                                                                            |
| Abendschön<br><i>et al.</i> (2020) | CAS (12),<br>SHAM (11),<br>a. o.                        | 3–7 d                                            | 2 INC, CUT       | NaClA                                | X                          |    |    |     | <b>Acute</b><br>-CAS: more defensive movements than SHAM during incision<br>-Highest score found in CAS during severing of cords, SHAM reduced movements and vocalizations ( $p < 0.05$ )<br>-No difference with regard to navigation time                                                                                                                                                                 |
| Bonastre <i>et al.</i><br>(2016)   | CAS (15),<br>SHAM (15),<br>a. o.                        | 4–7 d                                            | 2 INC, CUT       | -                                    |                            | X  |    | X   | <b>Acute</b><br>-Decreased skin temperature in CAS<br><b>Short-term</b><br>-Higher cortisol in CAS<br><b>Long-term</b><br>-Bodyweight not different between groups                                                                                                                                                                                                                                         |
| Byrd <i>et al.</i><br>(2020)       | CAS + BS (8),<br>CAS (7), SHAM<br>+ BS (7), SHAM<br>(8) | 10 d                                             | 1 INC, CUT       | BS, HRV                              |                            | X  |    |     | <b>Short-term</b><br>-CAS: greater low to high frequency ratio compared to SHAM<br>-Cortisol greater in CAS at 1 h compared to SHAM<br>-No effect of treatment lying behavior                                                                                                                                                                                                                              |
| Carroll <i>et al.</i><br>(2006)    | CAS (45),<br>SHAM (45)                                  | 3 d (23),<br>6 d (25),<br>9 d (24),<br>12 d (18) | 2 INC, CUT       | BS                                   | X                          | X  |    | X   | <b>Acute</b><br>-Cortisol greater in CAS than in SHAM<br>-No overall effect of age at castration on cortisol<br><b>Short-term</b><br>-At 2 h age effect ( $p = 0.01$ ) on standing: 3 d-old pigs more than 6, 9, or 12 d-old pigs<br>-no effect on growth at 24 or 48 h<br>-cortisol back at baseline in all groups at 24 h; after 48 h elevated ( $p < 0.01$ ) in 6, 9, and 12 d-old pigs in CAS and SHAM |
| Cordeiro <i>et al.</i><br>(2018)   | CAS (20)                                                | 7 d                                              | 1 INC, PULL      | TD (HOT), EN                         | X                          |    |    |     | <b>Acute</b><br>-Lower signal intensity during handling than during EN, TD, CAS<br>-Signal duration increased with handling, EN, TD, CAS                                                                                                                                                                                                                                                                   |
| Davis <i>et al.</i><br>(2017)      | CAS (25),<br>SHAM (26),<br>a. o.                        | 2–4 d                                            | 2 INC, PULL      | WAO, BS                              | X                          | X  |    |     | <b>Acute</b><br>-At 0, 15 and 30 min: CAS greater navigation time than SHAM ( $p < 0.05$ )                                                                                                                                                                                                                                                                                                                 |
| Gottardo <i>et al.</i><br>(2016)   | CAS (28),<br>SHAM (28),                                 | 4 d                                              | 2 INC, CUT       | -                                    | X                          | X  |    |     | <b>Acute</b><br>-CAS: greater cortisol than SHAM at 60 min ( $p < 0.001$ )                                                                                                                                                                                                                                                                                                                                 |



| Author<br>(year)                            | Setting/<br>Groups (n)              | Piglet age<br>(n)        | Technique(s) (n) | Other<br>procedures<br>performed (n) | Investigated<br>parameters |    |    |     | Main findings                                                                                                                                                                                                                                                                                                                                                                                                |
|---------------------------------------------|-------------------------------------|--------------------------|------------------|--------------------------------------|----------------------------|----|----|-----|--------------------------------------------------------------------------------------------------------------------------------------------------------------------------------------------------------------------------------------------------------------------------------------------------------------------------------------------------------------------------------------------------------------|
|                                             |                                     |                          |                  |                                      | B&V                        | PP | WH | G&V |                                                                                                                                                                                                                                                                                                                                                                                                              |
|                                             | a. o.                               |                          |                  |                                      |                            |    |    |     | <b>Short-term</b><br>-No treatment differences were significant at 180 min (cortisol)<br>-CAS increased frequency of pain-related behavior in the first 30 min than SHAM: more isolated and inactive than SHAM<br>-No behavioral differences at 60 min                                                                                                                                                       |
| Hay <i>et al.</i><br>(2003)                 | CAS (36),<br>SHAM (24),<br>CON (24) | 5 d                      | 2 INC, PULL      | -                                    | X                          | X  |    |     | <b>Short-term</b><br>-CAS: reduced activity at udder and more inactive ( $p < 0.001$ ) during the first 2.5 h compared to CON<br>-CAS: more pain-related behaviors for at least 2 d (e.g. tail wagging, rump scratching); reduced social cohesion ( $p < 0.001$ ); desynchronization ( $p < 0.05$ ).<br>-No clear effect on urinary corticosteroids and catecholamines<br>-Growth performance did not differ |
| Hofmann <i>et al.</i><br>(2019)             | CAS (24),<br>SHAM (24),<br>a. o.    | 3–6 d                    | 2 INC, CUT       | BS, AA                               |                            | X  | X  | X   | <b>Short-term</b><br>-30 min: CAS highest cortisol<br><b>Long-term</b><br>-Wound healing: median 7 (d 1), 6 (d 7), 4 (day 14)<br>-No effect on growth and losses                                                                                                                                                                                                                                             |
| Kattesh <i>et al.</i><br>(1996)             | CAS (24), CON<br>(12)               | 7 d (12), 14<br>d (12)   | 2 INC            | BS                                   |                            | X  |    |     | <b>Short- and long-term</b><br>-CAS on d 7 or 14 no effect on albumin, protein, cortisol in plasma<br>-Unbound cortisol decreased in all piglets over sampling period                                                                                                                                                                                                                                        |
| Kielly <i>et al.</i><br>(1999)              | CAS (241), CON<br>(241)             | 3 d (248),<br>10 d (234) | 2 INC            | -                                    |                            |    |    | X   | <b>Short-term</b><br>-CAS at 3 d less weight gain on 1st d ( $p = 0.01$ ) and 3rd d ( $p = 0.06$ )<br>-Weight gain not different between late CAS and CON<br><b>Long-term</b><br>-By weaning no differences between groups                                                                                                                                                                                   |
| Kluijvers-<br>Poodt <i>et al.</i><br>(2012) | CAS (32),<br>SHAM (32),<br>a. o.    | 2–5 d                    | 1 INC, CUT       | BS                                   | X                          | X  |    | X   | <b>Acute</b><br>-CAS: longer calls than SHAM<br><b>Short-term</b><br>-Litter effect on weight and growth, no treatment effect.<br>-no effects for glucose and creatine kinase                                                                                                                                                                                                                                |



| Author<br>(year)                     | Setting/<br>Groups (n)             | Piglet age<br>(n) | Technique(s) (n) | Other<br>procedures<br>performed (n) | Investigated<br>parameters |    |    |     | Main findings                                                                                                                                                                                                                                                                                                                                         |
|--------------------------------------|------------------------------------|-------------------|------------------|--------------------------------------|----------------------------|----|----|-----|-------------------------------------------------------------------------------------------------------------------------------------------------------------------------------------------------------------------------------------------------------------------------------------------------------------------------------------------------------|
|                                      |                                    |                   |                  |                                      | B&V                        | PP | WH | G&V |                                                                                                                                                                                                                                                                                                                                                       |
| Kluiivers-Poodt <i>et al.</i> (2013) | CAS, SHAM, CON, a. o. (total: 144) | 2–5 d             | 1 INC, CUT       | -                                    | X                          |    | X  | X   | <b>Short-term</b><br>-Behavior changes with age, independent of treatment<br>-No treatment effect on growth; wound healing was rapid in all treatments<br>-CON: more ( $p < 0.05$ ) No pain-related behavior than CAS                                                                                                                                 |
| Langhoff <i>et al.</i> (2009)        | CAS (38), SHAM (45), a. o.         | 4–6 d             | 2 INC, CUT       | NaClA, BS                            | X                          | X  |    |     | <b>Short-term</b><br>-CAS: higher cortisol at 30 min, 1 h, 4 h<br>-CAS: more tail wagging and hanging tail                                                                                                                                                                                                                                            |
| Lecchi <i>et al.</i> (2020)          | CAS (12), SHAM (12), a. o.         | 4 d               | 2 INC, PULL      | TD, IA, SS                           |                            | X  |    |     | <b>Short-term</b><br>-CAS: cortisol increased after 30 min<br>-Pain related genes identified in CAS: abundance increase of miR-19b, miR-27b, miR-365; no differences in SHAM                                                                                                                                                                          |
| Leidig <i>et al.</i> (2009)          | CAS (18), SHAM (25), a. o.         | 3–4 d             | 2 INC, CUT       | -                                    | X                          |    |    |     | <b>Acute</b><br>-Call duration enhanced from pre-treatment to CAS<br>-CAS: highest duration and intensity of defense behavior<br>-Not possible to separate effects of handling and castration                                                                                                                                                         |
| Lessard <i>et al.</i> (2002)         | CAS (6), SHAM (6), a. o.           | 3 d, 10 d, 17 d   | 2 INC, CUT       | BSAA                                 |                            | X  |    | X   | <b>Long-term</b><br>-No effect on BW<br>-3 d old: weaker antibody response to injected bovine serum albumin than in older groups<br>-No difference in antibody response in 3 d CAS and 3 d SHAM, but in 10 and 17 CAS weaker than 10 and 17 SHAM                                                                                                      |
| Llamas Moya <i>et al.</i> (2008a)    | CAS (20), SHAM (20)                | 5 d               | 2 INC, CUT       | BS                                   | X                          | X  |    |     | <b>Short-term</b><br>-CAS: pain-related behaviors ( $p < 0.001$ ) up to 4 d, immediately after castration (e.g. huddling up, spasms, trembling); less walking ( $p < 0.05$ ); more isolated and desynchronized ( $p < 0.1$ )<br>-No effect on plasma levels of TNF $\alpha$ , IL-1b, CRP, SAA and Hp<br>-CAS: higher cortisol than SHAM ( $p < 0.1$ ) |
| Llamas Moya <i>et al.</i> (2008b)    | CAS (32), CON (64)                 | 5 d               | 2 INC, CUT       | -                                    | X                          | X  |    | X   | <b>Long-term</b><br>-CAS reduced occurrence of sickness behaviors induced by low-dose endotoxin challenge<br>-No effect on inflammatory cytokines, acute phase proteins and cortisol                                                                                                                                                                  |



| Author<br>(year)                           | Setting/<br>Groups (n)                          | Piglet age<br>(n)                      | Technique(s) (n)       | Other<br>procedures<br>performed (n)                                                        | Investigated<br>parameters |    |    |     | Main findings                                                                                                                                                                                                                                                                                                                                                                                                                                                 |
|--------------------------------------------|-------------------------------------------------|----------------------------------------|------------------------|---------------------------------------------------------------------------------------------|----------------------------|----|----|-----|---------------------------------------------------------------------------------------------------------------------------------------------------------------------------------------------------------------------------------------------------------------------------------------------------------------------------------------------------------------------------------------------------------------------------------------------------------------|
|                                            |                                                 |                                        |                        |                                                                                             | B&V                        | PP | WH | G&V |                                                                                                                                                                                                                                                                                                                                                                                                                                                               |
| Lomax <i>et al.</i><br>(2017)              | CAS (10),<br>SHAM (10),<br>a. o.                | 3–5 d                                  | 2 INC, CUT             | -                                                                                           | X                          |    |    |     | <b>Acute</b><br>-Response scores not different immediately after CAS<br><b>Short-term</b><br>-Response increased significantly with weight of stimulation<br>-CAS: greater responses 2–4 h following castration ( $p < 0.001$ )<br>-Increase in response over 4 h in CAS ( $p < 0.001$ )                                                                                                                                                                      |
| Lonardi <i>et al.</i><br>(2015)            | CAS, SHAM                                       | 4 d                                    | 2 INC, CUT             | IA                                                                                          | X                          | X  |    |     | <b>Short-term</b><br>-Higher cortisol in CAS after 20 min<br>-higher eye and rectal temperature in CAS after 3h<br>-alterations in posture and walking in CAS                                                                                                                                                                                                                                                                                                 |
| Marchant-<br>Forde <i>et al.</i><br>(2009) | CAS (32),<br>SHAM + blood<br>(16),<br>SHAM (16) | 2–3 d                                  | CUT (16),<br>PULL (16) | BS                                                                                          | X                          | X  | X  | X   | <b>Acute</b><br>-PULL longer duration than CUT ( $p < 0.05$ )<br>-CUT and PULL: more squeals, grunts, and escape attempts ( $p < 0.05$ )<br>than in SHAM groups; no differences when time considered<br><b>Short- and long-term</b><br>- $\beta$ -endorphin greater at 45 min in CUT<br>-Growth rates in PULL less ( $p < 0.10$ ) than SHAM, CUT intermediate                                                                                                 |
| Marchant-<br>Forde <i>et al.</i><br>(2014) | CAS (40),<br>SHAM + blood<br>(20),<br>SHAM (20) | 2–3 d                                  | CUT (20),<br>PULL (20) | TR (CLIP or<br>GRIND), IA<br>(INJ or<br>ORAL), ID<br>(EN or ET), TD<br>(HOT or<br>COLD), BS | X                          | X  | X  | X   | <b>Acute</b><br>-CUT longer duration than PULL<br>-CAS more vocalization, escape attempts than SHAM ( $p < 0.05$ )<br>-PULL: fewer squeals per sec than SHAM + blood ( $p < 0.05$ )<br><b>Short- and long-term</b><br>-No differences in lesion scores between Less Stressful (CUT) and More<br>Stressful (PULL)<br>-D 2–7: growth rate of More Stressful lower than SHAM ( $p < 0.05$ ), Less<br>Stressful intermediate<br>-Cortisol higher in CAS than SHAM |
| Marx <i>et al.</i><br>(2003)               | CAS, SHAM, a.<br>o. (total: 70)                 | 7 d (28), 13<br>d (16), 19 d<br>(26 d) | EM                     | -                                                                                           | X                          |    |    |     | <b>Acute</b><br>-CAS: highest number of calls; higher screams<br>-Increased number of screams 30–110 s after start in CAS                                                                                                                                                                                                                                                                                                                                     |
| McGlone <i>et al.</i><br>(1993)            | CAS (455), CON<br>(389)                         | 1 d, 5 d, 10<br>d, 14 d, 15<br>d, 20 d | 2 INC, PULL            | EN, CLIP, IA<br>(d 1)                                                                       |                            |    |    | X   | <b>Short- and long-term</b><br>-Exp. 1: No age effect on behavior:<br>-Reduced suckling, standing, more lying in CAS regardless of age<br>-Exp. 2: growth did not differ between CON and CAS                                                                                                                                                                                                                                                                  |



| Author<br>(year)                          | Setting/<br>Groups (n)           | Piglet age<br>(n) | Technique(s) (n)               | Other<br>procedures<br>performed (n) | Investigated<br>parameters |    |    |     | Main findings                                                                                                                                                                                                                                                                                                                                                                        |
|-------------------------------------------|----------------------------------|-------------------|--------------------------------|--------------------------------------|----------------------------|----|----|-----|--------------------------------------------------------------------------------------------------------------------------------------------------------------------------------------------------------------------------------------------------------------------------------------------------------------------------------------------------------------------------------------|
|                                           |                                  |                   |                                |                                      | B&V                        | PP | WH | G&V |                                                                                                                                                                                                                                                                                                                                                                                      |
|                                           |                                  |                   |                                |                                      |                            |    |    |     | -CAS 14 d heavier at weaning than CAS 1 d                                                                                                                                                                                                                                                                                                                                            |
| Morrison and<br>Hemsworth<br>(2020)       | CAS, SHAM, a.<br>o. (total: 288) | 2 d               | 2 INC, CUT                     | BS                                   | X                          | X  |    |     | <b>Acute</b><br>-Duration of vocalization and escape attempts greater during CAS than SHAM and TD<br><b>Short-term</b><br>-Higher cortisol after 15 min in TD and CAS<br>-30 min: cortisol only higher in COLD and CAS<br>-More pain behavior in TD and CAS at 60 min, but no treatment effect after 24 h                                                                            |
| Pérez-<br>Pedraza <i>et al.</i><br>(2018) | CAS (24),<br>SHAM (12),<br>a. o. | 5 d               | 1 INC (12), 2 INC<br>(12), CUT | BS                                   |                            | X  | X  |     | <b>Acute</b><br>-Increases in lactate and hematocrit immediately after CAS or SHAM<br>-CAS: reduced pH and HCO <sub>3</sub> , higher lactate and base excess alterations<br>-Metabolic acidosis greater in CAS (1 INC) than in CAS (2 INC)                                                                                                                                           |
| Prunier <i>et al.</i><br>(2005)           | CAS (6), SHAM<br>(6), CON (6)    | 5–6 d             | 2 INC, CUT                     | BS                                   |                            | X  |    |     | <b>Short-term</b><br>-CAS: increases ( $p < 0.05$ ) in adrenocorticotropin hormone, cortisol, and lactate (not in TD or TR)<br>-Adrenocorticotropin hormone higher in CAS than in SHAM and CON ( $p < 0.05$ ), SHAM and CON similar ( $p > 0.10$ )<br>-Cortisol higher in CAS than in SHAM and CON, SHAM and CON similar ( $p > 0.10$ )<br>-Lactate: CAS > SHAM > CON ( $p < 0.05$ ) |
| Puppe <i>et al.</i><br>(2005)             | CAS (19)                         | 14 d              | EM                             | -                                    | X                          |    |    |     | <b>Acute</b><br>-Effect of CAS on call duration, peak frequency, pureness, entropy of sound)<br>-surgical period differed from postsurgical handling in all measures; presurgical handling differed only in pureness and entropy                                                                                                                                                     |
| Rauh <i>et al.</i><br>(2019)              | CAS (24),<br>SHAM (24),<br>a. o. | 3–6 d             | 2 INC, CUT                     | BS, AA                               |                            | X  | X  | X   | <b>Short-term</b><br>-SHAM: fewer defensive movements during fixation ( $p \leq 0.05$ )<br>-During CAS: highest defensive movements at severing of cord<br>-Adrenalin and Noradrenalin rose in all groups, CAS: higher increase of Noradrenalin than SHAM ( $p \leq 0.05$ )                                                                                                          |



| Author<br>(year)                   | Setting/<br>Groups (n)                           | Piglet age<br>(n) | Technique(s) (n) | Other<br>procedures<br>performed (n) | Investigated<br>parameters |    |    |     | Main findings                                                                                                                                                                                                                                                                                                                       |
|------------------------------------|--------------------------------------------------|-------------------|------------------|--------------------------------------|----------------------------|----|----|-----|-------------------------------------------------------------------------------------------------------------------------------------------------------------------------------------------------------------------------------------------------------------------------------------------------------------------------------------|
|                                    |                                                  |                   |                  |                                      | B&V                        | PP | WH | G&V |                                                                                                                                                                                                                                                                                                                                     |
| Reynolds <i>et al.</i><br>(2020)   | CAS (25),<br>SHAM + IA (25),<br>SHAM (25), a. o. | 3–5 d             | 1 INC            | IA                                   | X                          |    |    |     | <b>Short-term</b><br>-CAS: Longer navigation through chute after 25 min ( $p < 0.001$ )<br>-Higher cortisol in CAS after 1 h                                                                                                                                                                                                        |
| Saller <i>et al.</i><br>(2020)     | CAS (12),<br>SHAM (11),<br>a. o.                 | 3–7 d             | 2 INC, CUT       | NaClA                                | X                          | X  |    |     | <b>Acute</b><br>-Arterial blood pressure higher in CAS during incision and cutting of<br>cords than SHAM ( $p < 0.001$ )<br>-CAS: higher heart rate after cutting of cords than SHAM ( $p < 0.001$ )<br>-Cortisol not different between groups, but within groups higher values<br>after 20 and 40 min ( $p < 0.001$ )              |
| Schön <i>et al.</i><br>(2006)      | CAS (19)                                         | 14 d              | EM               | -                                    | X                          |    |    |     | <b>Acute</b><br>-During CAS: longer, higher, purer vocalization<br>-Lower peak frequency after surgery than before ( $p < 0.001$ ).                                                                                                                                                                                                 |
| Sutherland <i>et al.</i><br>(2010) | CAS (10),<br>SHAM (10),<br>a. o.                 | 3 d               | 2 INC, PULL      | BS                                   | X                          | X  |    | X   | <b>Acute</b><br>-Vocalizations greater ( $p < 0.05$ ) in CAS compared to CON<br><b>Short-term</b><br>-Leukocyte counts not different among treatments<br>-Cortisol elevated ( $p < 0.06$ ) in CAS compared to SHAM<br>-Bodyweight not different after 24 h                                                                          |
| Sutherland <i>et al.</i><br>(2012) | CAS (10),<br>SHAM (10),<br>a. o.                 | 3 d               | 2 INC, CUT       | BS                                   | X                          | X  |    | X   | <b>Acute</b><br>-More stress vocalizations in CAS<br><b>Short-term</b><br>-CAS more time lying without contact at 30 min<br>-Higher cortisol in CAS after 30, 60, 120 min<br>-C reactive protein tended to be higher in CAS<br>-After 24 h no difference in body weight                                                             |
| Sutherland <i>et al.</i><br>(2017) | CAS (9), SHAM<br>(9),<br>a. o.                   | 3 d               | 2 INC, CUT       | BS                                   | X                          | X  |    |     | <b>Acute</b><br>-More vocalizations in CAS than in SHAM ( $p = 0.004$ )<br>-Tail movement and behavioral scores greater ( $p \leq 0.01$ ) in CAS than in<br>CON<br><b>Short-term</b><br>-Cortisol elevated ( $p < 0.05$ ) in CAS compared to CON<br>-CAS: more time lying without contact than CON; no effect on other<br>behaviors |



| Author<br>(year)                     | Setting/<br>Groups (n)             | Piglet age<br>(n) | Technique(s) (n)              | Other<br>procedures<br>performed (n) | Investigated<br>parameters |    |    |     | Main findings                                                                                                                                                                                                                                                                                                 |
|--------------------------------------|------------------------------------|-------------------|-------------------------------|--------------------------------------|----------------------------|----|----|-----|---------------------------------------------------------------------------------------------------------------------------------------------------------------------------------------------------------------------------------------------------------------------------------------------------------------|
|                                      |                                    |                   |                               |                                      | B&V                        | PP | WH | G&V |                                                                                                                                                                                                                                                                                                               |
| Taylor and Weary (2000)              | CAS, SHAM (total: 139)             | 7–13 d            | 2 INC, CUT, PULL              | -                                    | X                          |    |    |     | <b>Acute</b><br>-CAS: incision more high-frequency calling than restraint in SHAM<br>-PULL/CUT of spermatic cords: greatest amount of calling, more than incision, regardless of order of events ( $p < 0.001$ )<br>-No difference in calling between PULL and CUT                                            |
| Taylor <i>et al.</i> (2001)          | CAS, SHAM (total: 84)              | 3 d, 10 d, 17 d   | 2 INC, CUT                    | -                                    | X                          |    |    |     | <b>Acute</b><br>-CAS: 3 times more high and low frequency calls than SHAM<br>-Rate of high frequency calling lower for youngest pigs; but no age by treatment interaction<br><b>Short-term</b><br>-2 h after CAS: more sitting, standing, less lying<br>-During 22 h, CAS more time at udder, less lying down |
| Übel <i>et al.</i> (2015)            | CAS, CAS + TD + ET, SHAM, a. o.    | 3–4 d             | 2 INC, CUT                    | TD (COLD), ET, IA, BS                | X                          | X  |    |     | <b>Short-term</b><br>-CAS: higher cortisol after 30 and 60 min than SHAM ( $p < 0,05$ )<br>-Higher cortisol for 4 h after CAS + TD + ET than after CAS and SHAM<br>-Weights not different 4 d after SHAM, CAS and CAS + TD + ET                                                                               |
| van Beirendonck <i>et al.</i> (2012) | CAS (total: 295)                   | 1 d               | 1 INC, CUT                    | ET, TR, TD, IA                       | X                          |    | X  | X   | <b>Short-term</b><br>-Differences in behavior, but weight at weaning not different<br>-Mortality higher in lightest piglets                                                                                                                                                                                   |
| Viscardi <i>et al.</i> (2017)        | CAS + TD (2), CAS + TD + NaClA (5) | 5 d               | 1 INC, PULL                   | TD (COLD), IA                        | X                          |    |    |     | <b>Short-term</b><br>-More inactive behaviors up to 6 h post-CAS and TD<br>-Behavioral changes up to 7 h post-CAS compared to baseline<br>-Higher grimace scores at 0, 3, 4, 5 h post-CAS compared to scores at 7 h                                                                                           |
| Viscardi and Turner (2018a)          | CAS + NaCl (15), SHAM (15), a. o.  | 5 d               | 2 INC, PULL                   | NaClA                                | X                          |    |    |     | <b>Short-term</b><br>-More pain behaviors and tail wagging in CAS ( $p < 0.05$ )<br>-Increased pain behavior in CAS after 24 h                                                                                                                                                                                |
| Viscardi and Turner (2018b)          | CAS + NaCl (15), SHAM (15), a. o.  | 5 d               | 2 INC, PULL                   | NaClA                                | X                          |    |    |     | <b>Short-term</b><br>-More tail wagging and pain behavior in CAS<br>-More pain behaviors after 24 h                                                                                                                                                                                                           |
| Viscardi <i>et al.</i> (2020)        | CAS (20), SHAM (10)                | 2 d               | 1 INC, CUT (10) or LASER (10) | -                                    | X                          | X  | X  |     | <b>Short-term</b><br>-Laser-CAS: more pain behaviors than scalpel-CAS ( $p = 0.05$ )<br>-Laser-CAS: more agonistic behavior than scalpel-CAS ( $p = 0.005$ ) and SHAM ( $p = 0.036$ )                                                                                                                         |



| Author<br>(year)              | Setting/<br>Groups (n)           | Piglet age<br>(n)                                     | Technique(s) (n) | Other<br>procedures<br>performed (n) | Investigated<br>parameters |    |    |     | Main findings                                                                                                                                                                                                                                                                                                                                             |
|-------------------------------|----------------------------------|-------------------------------------------------------|------------------|--------------------------------------|----------------------------|----|----|-----|-----------------------------------------------------------------------------------------------------------------------------------------------------------------------------------------------------------------------------------------------------------------------------------------------------------------------------------------------------------|
|                               |                                  |                                                       |                  |                                      | B&V                        | PP | WH | G&V |                                                                                                                                                                                                                                                                                                                                                           |
|                               |                                  |                                                       |                  |                                      |                            |    |    |     | -No difference in wound healing or blood parameters                                                                                                                                                                                                                                                                                                       |
| Weary <i>et al.</i><br>(1998) | CAS, SHAM<br>(total: 102)        | 8–12 d                                                | 2 INC, CUT       | -                                    | X                          |    |    |     | <b>Acute</b><br>-CAS: more high frequency calls than SHAM<br>-Exp. 1: greatest differences between CAS and SHAM during severing of spermatic cords<br>-Exp. 2/3: CAS high frequency calls at faster rates than SHAM                                                                                                                                       |
| White <i>et al.</i><br>(1995) | CAS (86),<br>a. o.               | 1 d, 2 d, 4<br>d, 8 d, 16 d,<br>24 d (26 ≤ n<br>≤ 30) | 2 INC, CUT       | -                                    |                            | X  |    |     | <b>Short-term</b><br>-CAS: higher heat rate, higher vocalizations<br>-Severing of spermatic cord: greater heart rate response<br>-Castration without anesthetic greater stress for pigs 8 d or older<br>-respiration rate: no variable measure of stress associated with castration                                                                       |
| Yun <i>et al.</i><br>(2019)   | CAS (29),<br>SHAM (29),<br>a. o. | 5 d                                                   | 2 INC            | -                                    | X                          |    |    |     | <b>Acute</b><br>-Pain behavior during castration<br>-More tail wagging and aggressive behavior in SHAM<br><b>Short-term</b><br>-Behavioral changes after castration, abnormal behaviors<br>-CAS induced changes in behavioral measures at 0 h<br>-Inactive standing or sitting, tail wagging and aggressive behavior differed between CAS and SHAM at 0 h |
| Zöls <i>et al.</i><br>(2006)  | CAS (48)<br>SHAM (46),<br>a. o.  | 4–6 d                                                 | 2 INC, CUT       | BS                                   |                            | X  |    |     | <b>Short-term</b><br>-CAS: higher cortisol after 1 and 4 h ( $p \leq 0.05$ ) than SHAM<br>-No difference in cortisol after 28 h                                                                                                                                                                                                                           |

AA = analgesia administration; a. o. = and others; BS = blood sampling; BSAA = bovine serum albumin application; B&V = Behavior & vocalization; CAS = castration; CON = control piglets (not handled); d = days; EM = emasculator; EN = ear notching; ET = ear tagging; G&V = growth & vitality; HRV = heart rate variability; IA = iron application; INC = incision (1 = horizontal; 2 = vertical); INJ = injection; m = months; NaClA = NaCl application; PP = physiological parameters; SHAM = sham-handled piglets; SS = saliva sampling; TD = tail docking; TR = teeth resection; w = weeks; WAO = water administration orally; WH = wound healing.
